# Supplementary material
Source: publisher figshare collection journal article supplement (https://frontiersin.figshare.com/ndownloader/files/24496067)
Supplement: Supplementary file [file 24496067]

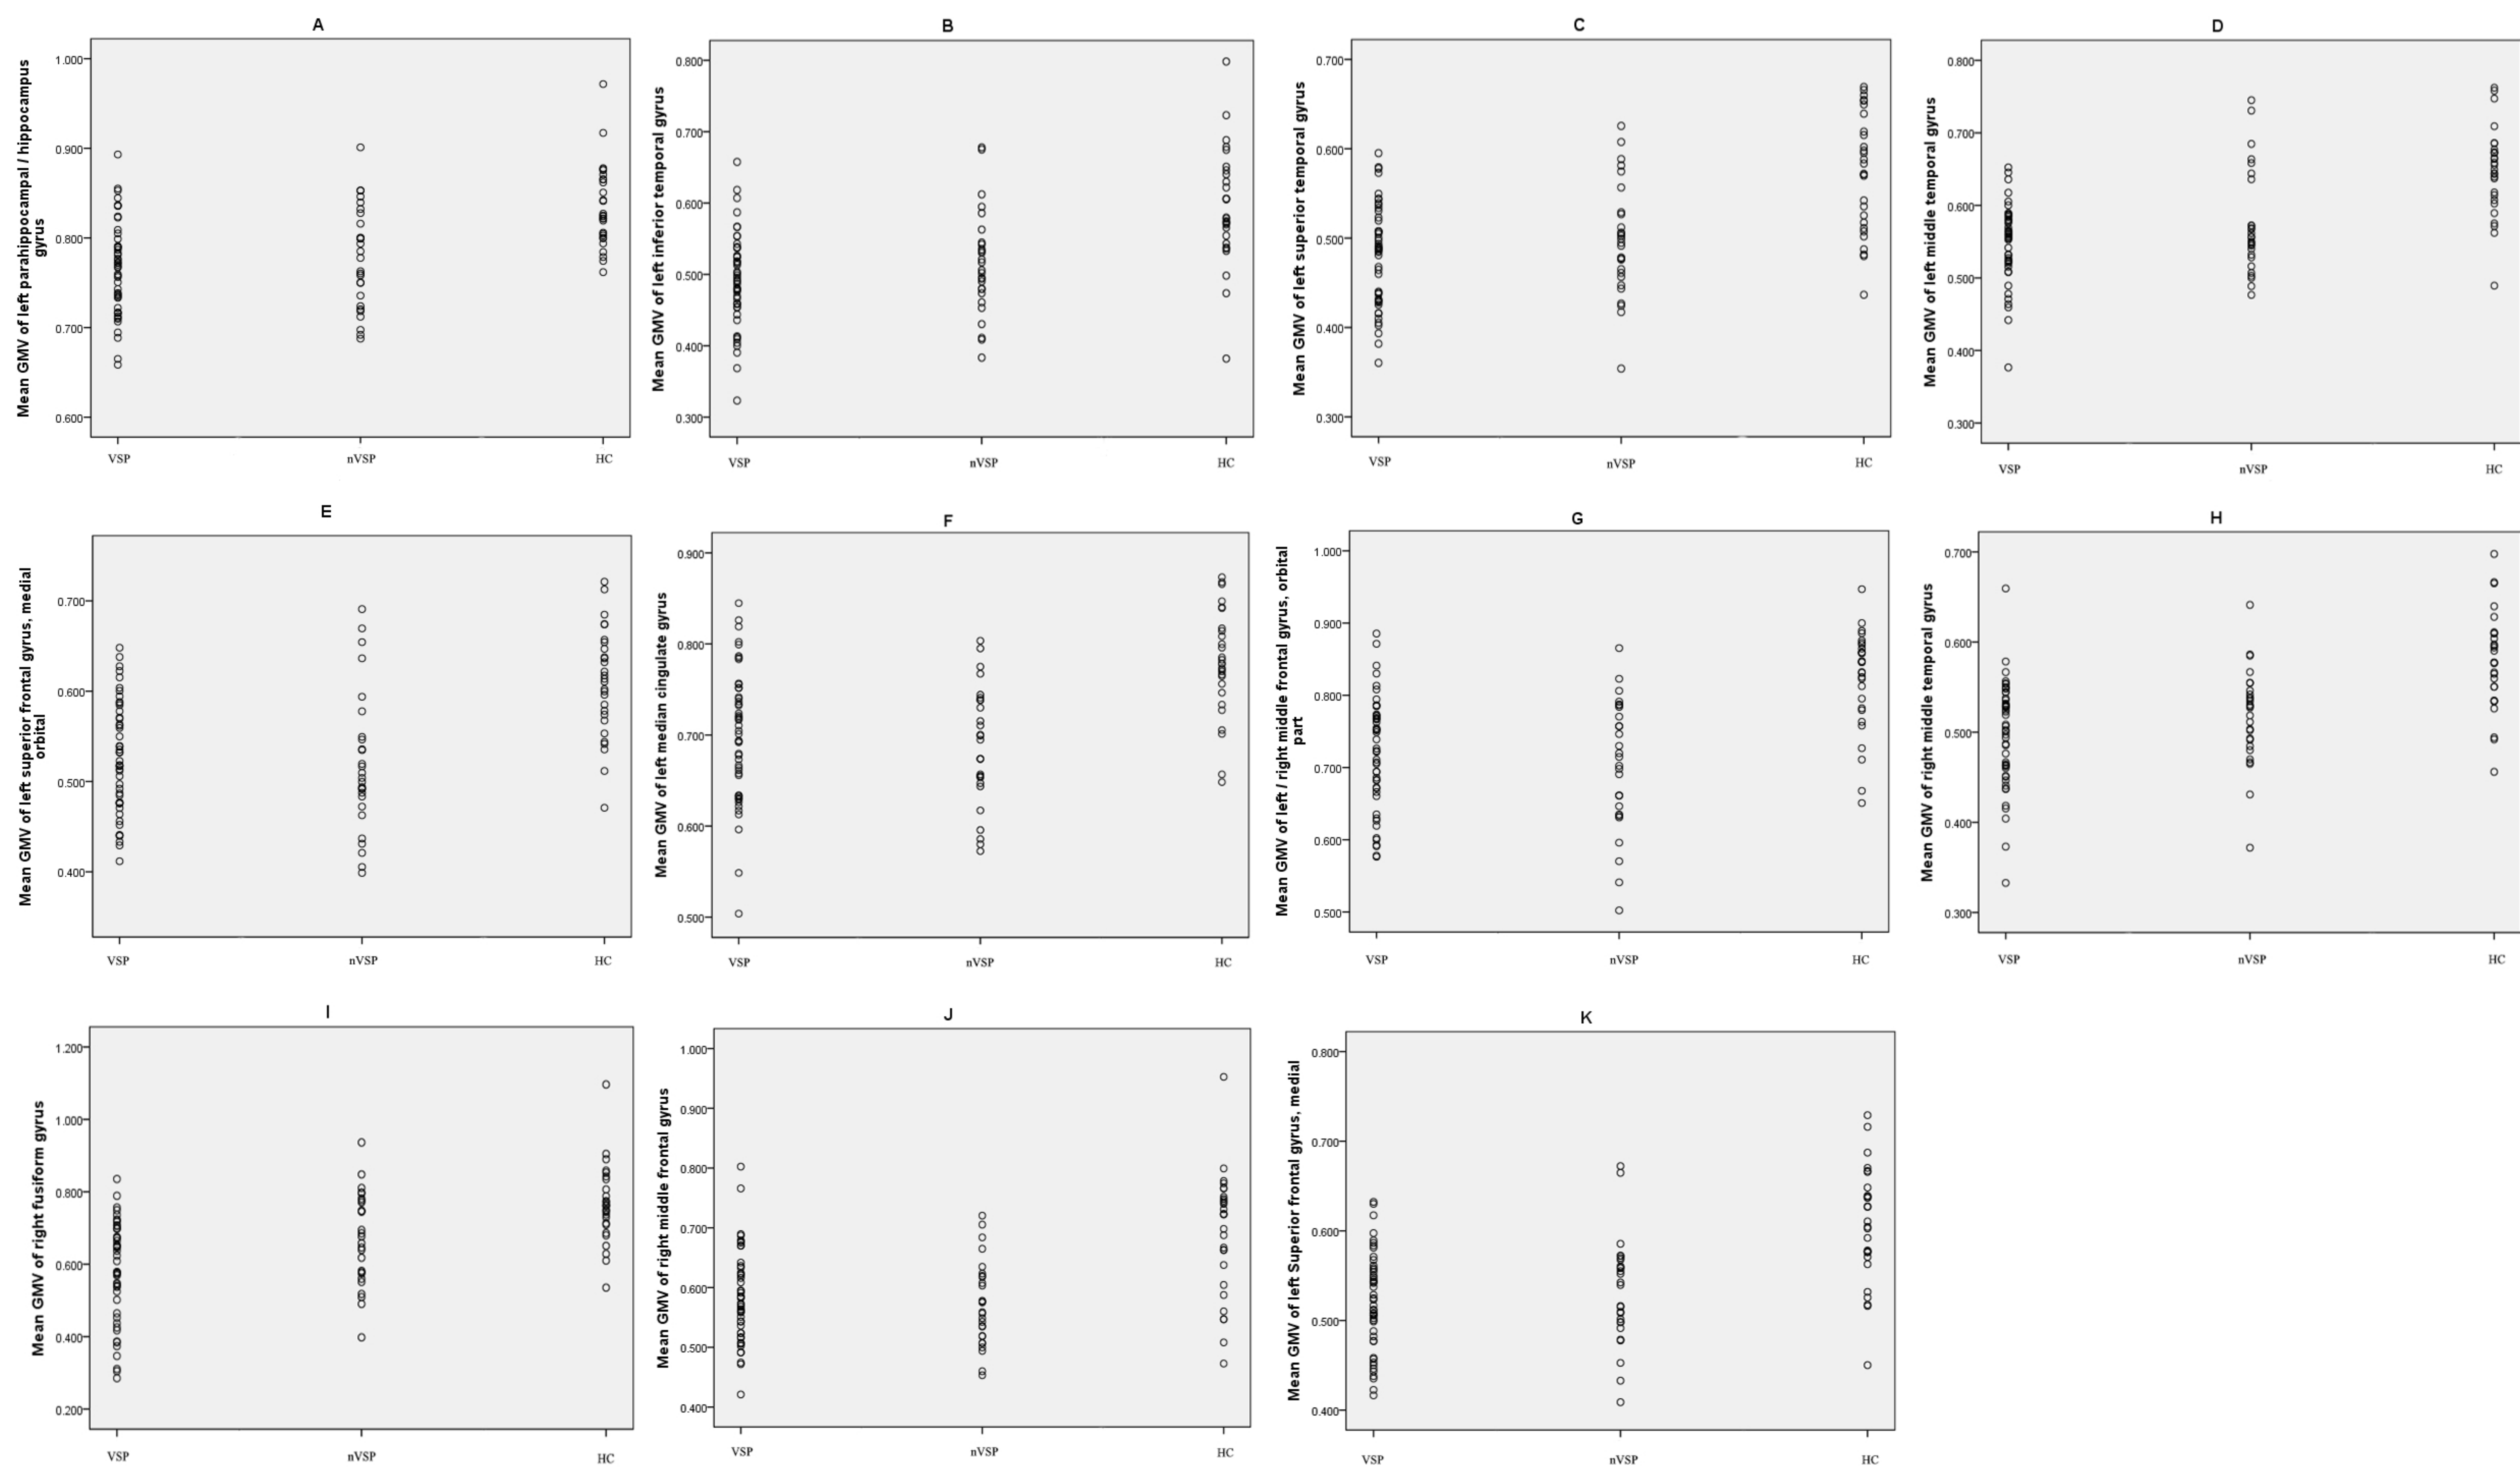

Fig. 3. Mean gray-matter volumes of significant brain regions in the violent schizophrenia patients (VSPs), non-violent schizophrenia patients (nVSPs) and healthy controls (HCs).
